# Supplementary figures and images for: Phototrophic Bioremediation of Municipal Tertiary Wastewater Coupling with Lipid Biosynthesis Using Scenedesmus dimorphus: Effect of Nitrogen to Phosphorous Ratio with/without CO2 Supplementation
Source: MDPI journal article supplement (doi:10.3390/su15021409), 2023-01-11

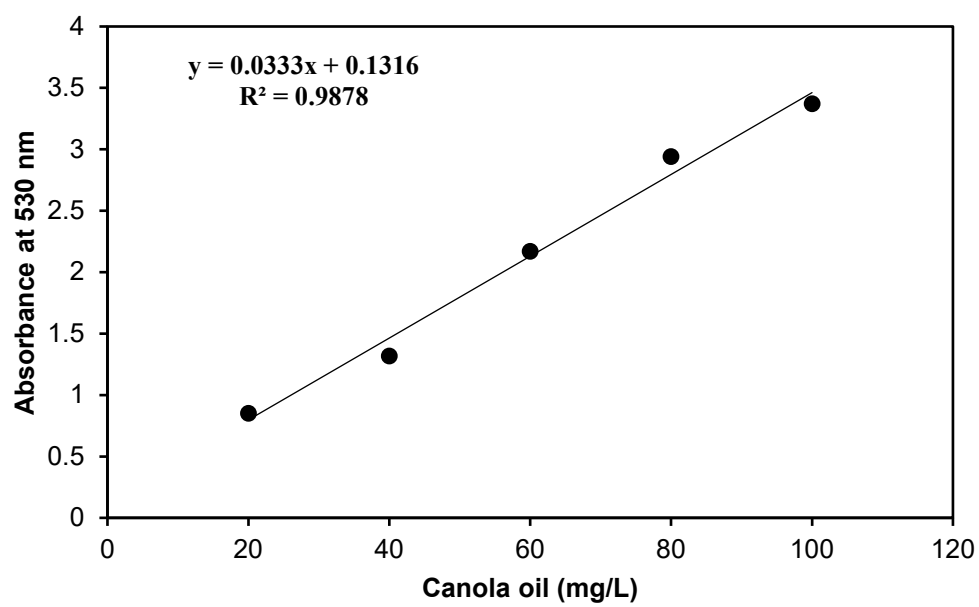

**Figure S1.** Calibration curve for lipid quantification.

Supplement: s1 [file s1]
